# Supplementary material for: Synergetic catalysis of bimetallic copper–cobalt nanosheets for direct synthesis of ethanol and higher alcohols from syngas
Source: Royal Society of Chemistry journal article supplement (doi:10.1039/c8cy01074a), 2018-01-01
Supplement: c8cy01074a1.pdf [file c8cy01074a1.pdf]

## Electronic Supplementary Information

### Synergetic catalysis of bimetallic copper-cobalt nanosheets for direct synthesis of ethanol and higher alcohols from syngas

Kai Sun,<sup>a,b</sup> Xiaofeng Gao,<sup>a,b</sup> Yunxing Bai,<sup>a,b</sup> Minghui Tan,<sup>a</sup> Guohui Yang<sup>a</sup> and Yisheng Tan<sup>\*a</sup>

<sup>a</sup> State Key Laboratory of Coal Conversion, Institute of Coal Chemistry, Chinese Academy of Sciences, Taiyuan 030001, China

<sup>b</sup> University of Chinese Academy of Sciences, Beijing 100049, China

\*Corresponding author

E-mail address: tan@sxicc.ac.cn; Tel. / fax: +086-351-4044287

#### 1. Figures

**Fig. S1** XRD patterns of the  $\text{Cu}_x\text{Co}_y\text{Al}$  with different Cu/Co mole ratios (x/y) of (a) 1:2; (b) 1:1; (c) 2:1; (d) 4:1; (e) 8:1.

**Fig. S2** XRD patterns of the (a) CuCoAl, (b) Cu/CoAl, (c) Co/CuAl and (d) CuCo/Al-IM catalysts (A) after reduction and (B) after 12 h reaction.

**Fig. S3** SEM-EDX elemental mapping images for O, Cu, Co, Al, and C of the CuCoAl-LDH precursor.

**Fig. S4** SEM images of (A) Cu/CoAl, (B) Co/CuAl and (C) CuCoAl catalysts.

**Fig. S5** HAADF-STEM images of the reduced (A) Cu/CoAl, (B) Co/CuAl and (C) CuCo/Al-IM catalysts and the corresponding elemental EDX maps of Cu, Co and Al.

**Fig. S6** TEM images of the spent (A) CuCoAl and (B) CuCo/Al-IM catalysts after 72 h reaction.

**Fig. S7** The CO conversion and products selectivity for (A)  $\text{Cu}_2\text{Co}_1\text{Al}$  and (B) CuCo/Al-IM catalysts with reaction time on stream at  $T=270\text{ }^\circ\text{C}$ ,  $P=2.5\text{ MPa}$ ,  $\text{GHSV}=7500\text{ h}^{-1}$  and  $\text{H}_2/\text{CO}=2/1$ .

**Fig. S8** Anderson-Schulz-Flory (ASF) plots for the distributions of hydrocarbons and alcohols obtained for (A) CuCoAl, (B) Cu/CoAl, (C) Co/CuAl and (D) CuCo/Al-IM.

**Fig. S9** (A)  $\text{N}_2$  adsorption-desorption isotherms and (B) pore size distribution curves

of the (a) CoAl, (b) CuAl, (c) Cu/CoAl, (d) Co/CuAl, (e) CuCoAl and (f) CuCo/Al-IM catalysts.

**Fig. S10** XPS spectra of (A) Cu 2p and (B) Co 2p for calcined CuCoAl catalyst.

## **2. Tables**

**Table S1** Lattice parameters for different  $\text{Cu}_x\text{Co}_y\text{Al-LDH}$ .

**Table S2** The catalytic performance for the bimetallic CuCo catalysts at a close CO conversion level.

**Table S3** The XPS and XAES data of copper in reduced catalysts.

**Table S4** Quantitative analysis about the surface Co species concentration from XPS spectra.

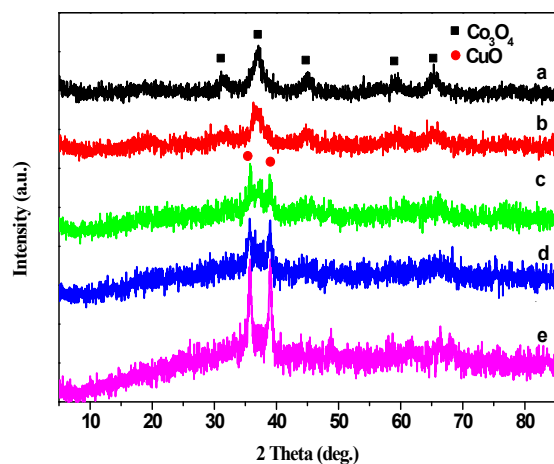

**Fig. S1** XRD patterns of the  $\text{Cu}_x\text{Co}_y\text{Al}$  catalysts with different Cu/Co mole ratios ( $x/y$ ) of (a) 1:2; (b) 1:1; (c) 2:1; (d) 4:1; (e) 8:1.

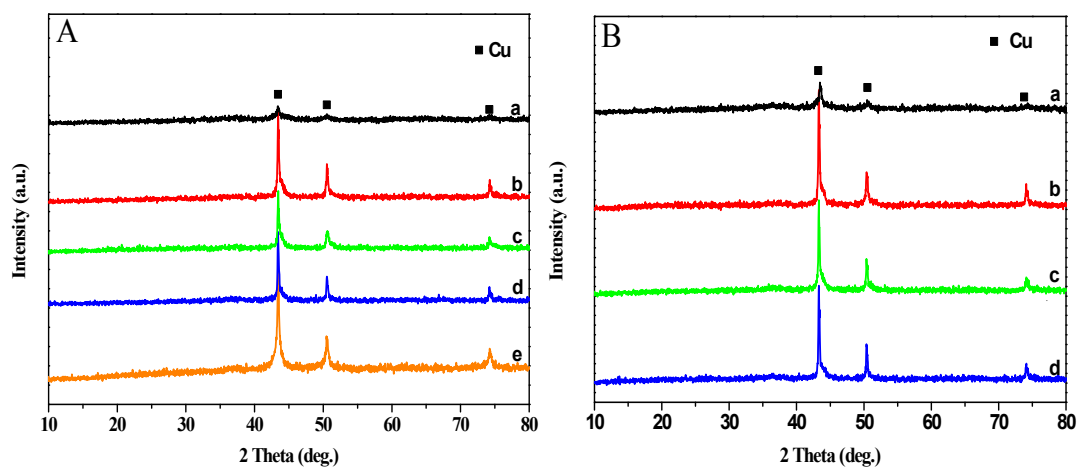

**Fig. S2** XRD patterns of the (a) CuCoAl, (b) Cu/CoAl, (c) Co/CuAl, (d) CuCo/Al-IM and (e) CuAl catalysts (A) after reduction and (B) after 12 h reaction.

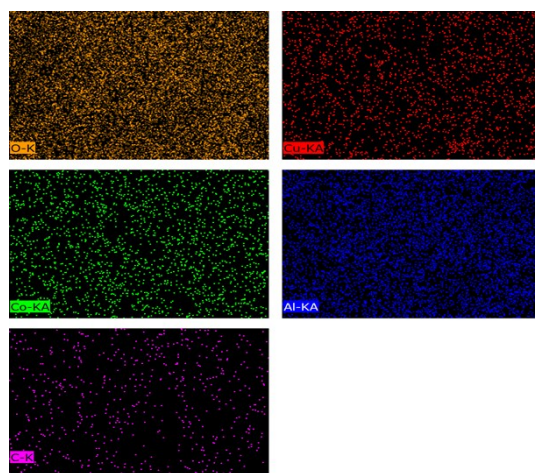

**Fig. S3** SEM-EDX elemental mapping images for O, Cu, Co, Al, and C of the CuCoAl-LDH precursor.

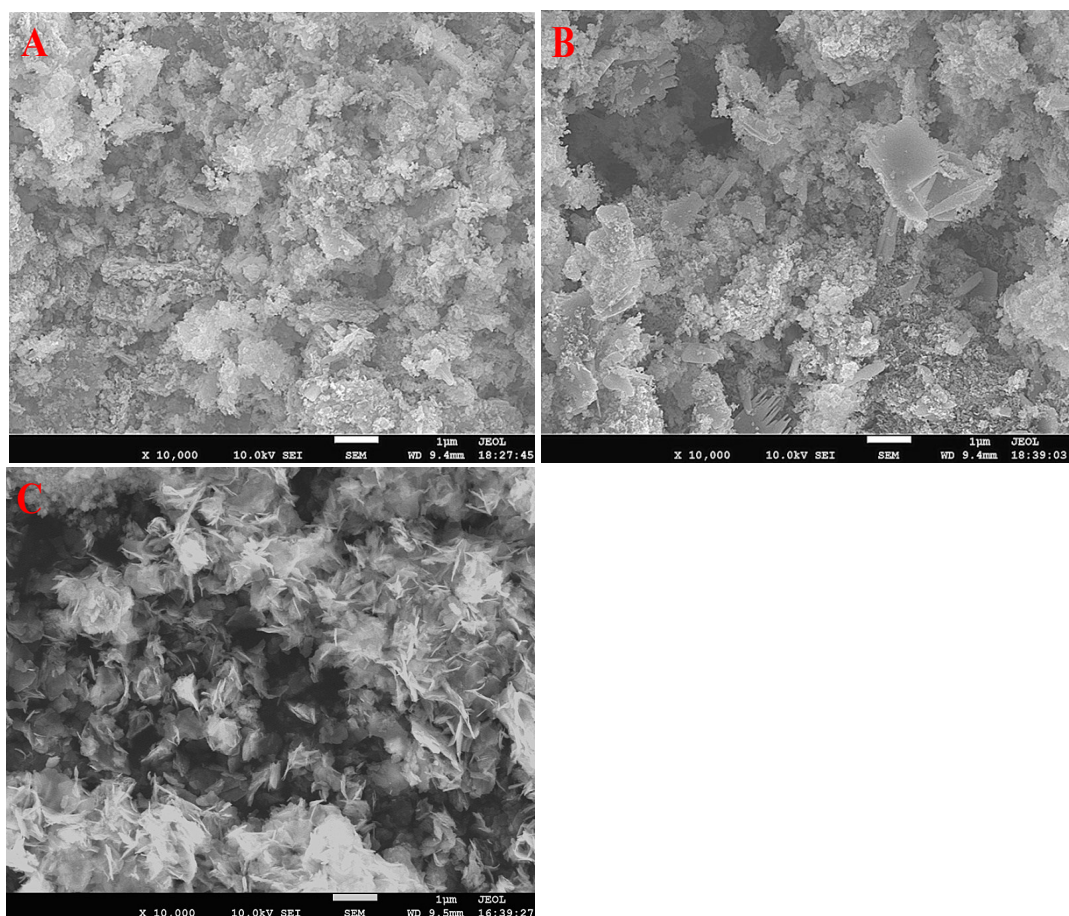

**Fig. S4** SEM images of (A) Cu/CoAl, (B) Co/CuAl and (C) CuCoAl catalysts.

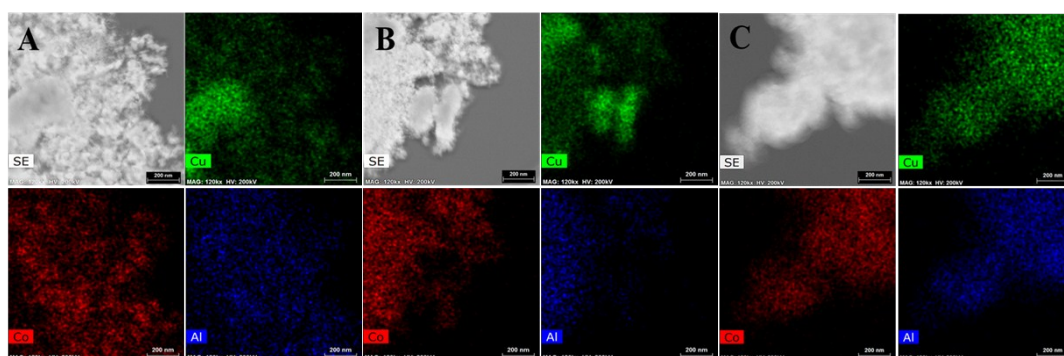

**Fig. S5** HAADF-STEM images of the reduced (A) Cu/CoAl, (B) Co/CuAl and (C) CuCoAl/Al-IM catalysts and the corresponding elemental EDX maps of Cu, Co and Al.

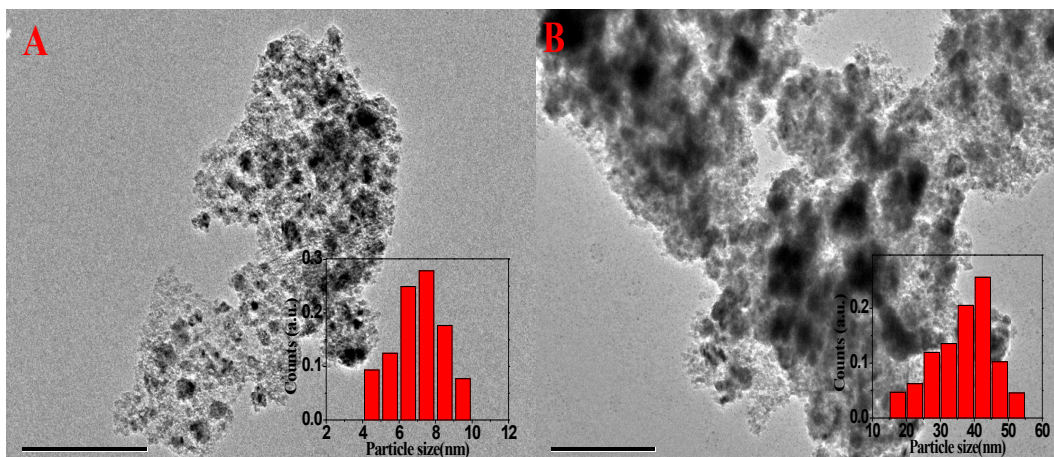

Fig. S6 TEM images of the spent (A) CuCoAl and (B) CuCo/Al-IM catalysts after 72 h reaction.

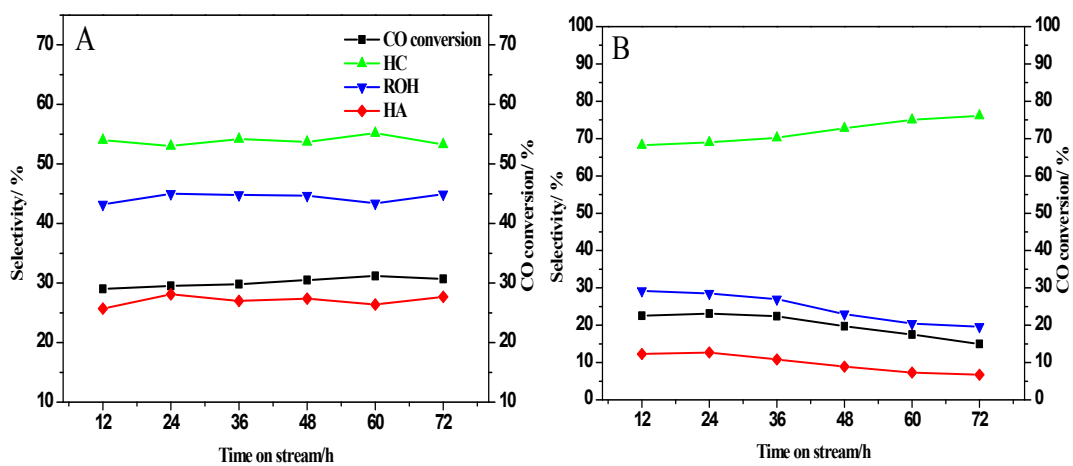

Fig. S7 The CO conversion and products selectivity for (A)  $\text{Cu}_2\text{Co}_1\text{Al}$  and (B) CuCo/Al-IM catalysts with reaction time on stream at  $T=270^\circ\text{C}$ ,  $P=2.5\text{MPa}$ ,  $\text{GHSV}=7500\text{ h}^{-1}$  and  $\text{H}_2/\text{CO}=2/1$ .

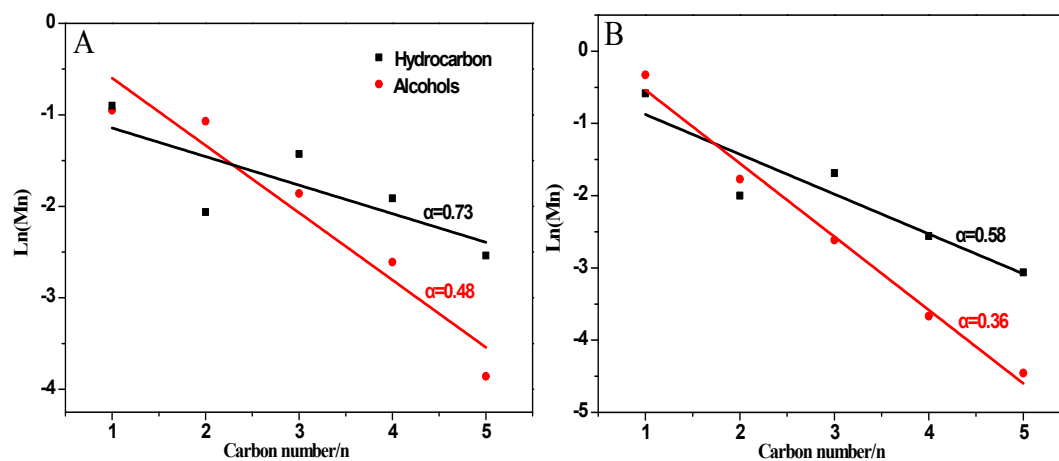

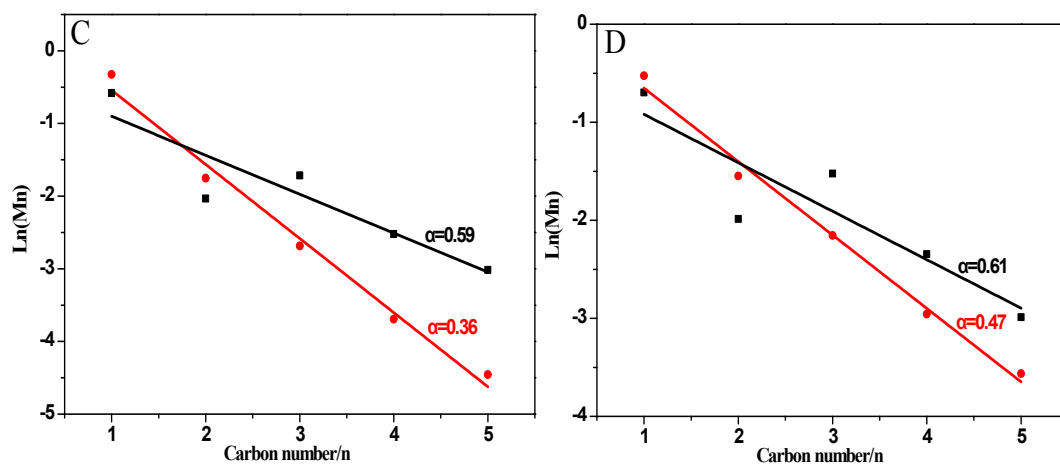

Fig. S8 Anderson-Schulz-Flory (ASF) plots for the distributions of hydrocarbons and alcohols obtained for (A) CuCoAl, (B) Cu/CoAl, (C) Co/CuAl and (D) CuCo/Al-IM.

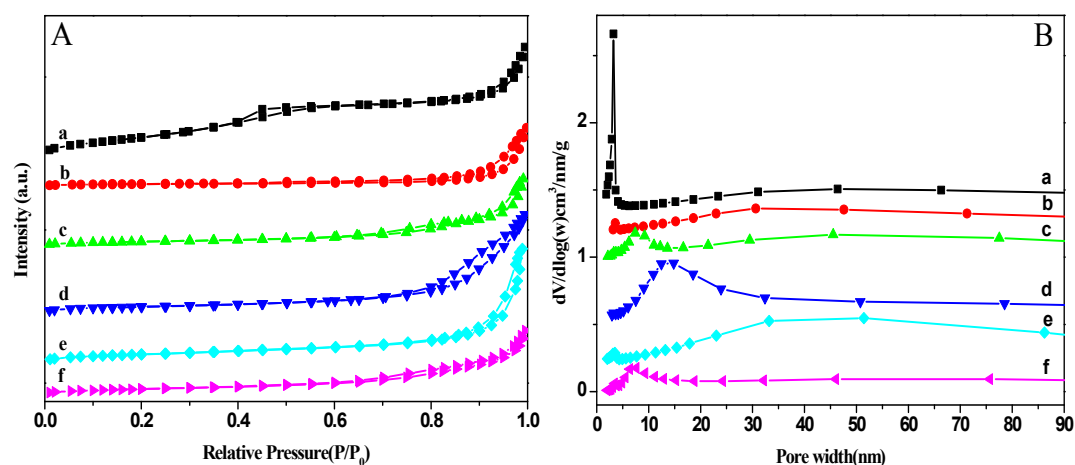

Fig. S9 (A)  $N_2$  adsorption-desorption isotherms and (B) pore size distribution curves of the (a) CoAl, (b) CuAl, (c) Cu/CoAl, (d) Co/CuAl, (e) CuCoAl and (f) CuCo/Al-IM catalysts.

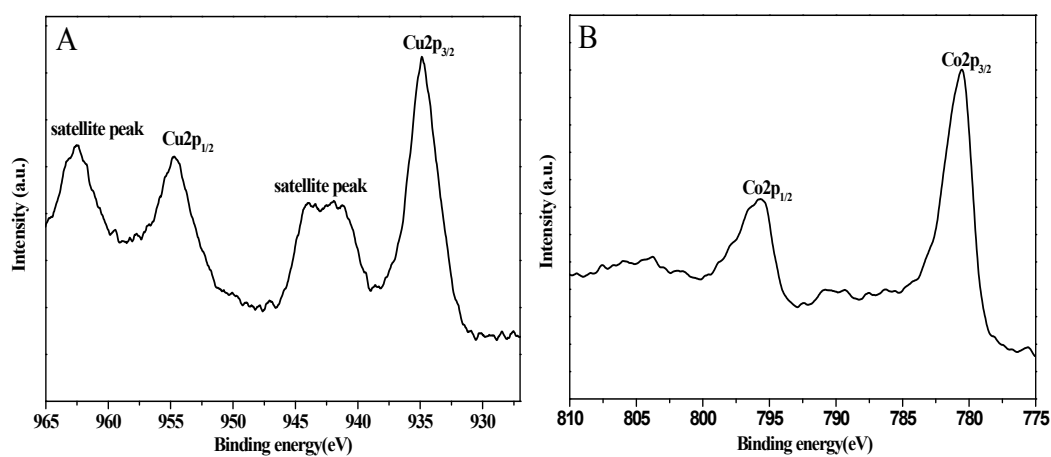

Fig. S10 XPS spectra of (A) Cu 2p and (B) Co 2p for calcined CuCoAl catalyst.

## Tables

**Table S1** Lattice parameters for different  $\text{Cu}_x\text{Co}_y\text{Al-LDH}$ .

| Catalysts                             | a (nm) | c (nm) |
|---------------------------------------|--------|--------|
| CoAl-LDH                              | 0.3072 | 2.246  |
| $\text{Cu}_1\text{Co}_2\text{Al-LDH}$ | 0.3072 | 2.252  |
| $\text{Cu}_1\text{Co}_1\text{Al-LDH}$ | 0.3070 | 2.247  |
| $\text{Cu}_2\text{Co}_1\text{Al-LDH}$ | 0.3068 | 2.263  |
| $\text{Cu}_4\text{Co}_1\text{Al-LDH}$ | 0.3064 | 2.246  |
| $\text{Cu}_8\text{Co}_1\text{Al-LDH}$ | -      | 2.241  |
| CuAl-LDH                              | -      | 2.240  |
| Cu/CoAl-LDH                           | -      | 2.045  |
| Co/CuAl-LDH                           |        | 2.068  |

**Table S2** The catalytic performance for the bimetallic CuCo catalysts at a close CO conversion level.

| Catalyst                          | CO Conv. (%) | C-Balance(%) | Selectivity (C mol %) |                       |     |               |      | Alcohols distribution (C mol %) |      |      |      |                        |
|-----------------------------------|--------------|--------------|-----------------------|-----------------------|-----|---------------|------|---------------------------------|------|------|------|------------------------|
|                                   |              |              | $\text{CH}_4$         | $\text{C}_2+\text{H}$ | DME | $\text{CO}_2$ | ROH  | MeOH                            | EtOH | PrOH | BuOH | $\text{C}_5+\text{OH}$ |
| $\text{Cu}_1\text{Co}_2\text{Al}$ | 28.9         | 99.0         | 31.1                  | 37.6                  | 1.2 | 3.8           | 26.3 | 45.3                            | 30.3 | 15.3 | 7.8  | 1.3                    |
| $\text{Cu}_1\text{Co}_1\text{Al}$ | 28.5         | 98.2         | 24.7                  | 35.6                  | 1.3 | 1.9           | 36.5 | 42.9                            | 30.7 | 15.8 | 9.2  | 1.4                    |
| $\text{Cu}_2\text{Co}_1\text{Al}$ | 29.2         | 101.6        | 22.1                  | 32.3                  | 1.1 | 0.5           | 44.0 | 40.7                            | 34.3 | 15.6 | 7.3  | 2.1                    |
| $\text{Cu}_4\text{Co}_1\text{Al}$ | 25.7         | 99.7         | 24.4                  | 35.3                  | 2.4 | 1.3           | 36.6 | 49.4                            | 32.3 | 12.3 | 4.3  | 1.7                    |
| $\text{Cu}_8\text{Co}_1\text{Al}$ | 26.8         | 100.8        | 35.6                  | 29.5                  | 0.4 | 4.0           | 30.5 | 57.5                            | 25.9 | 9.5  | 4.9  | 2.2                    |
| Cu/CoAl                           | 25.2         | 99.6         | 39.1                  | 33.0                  | 1.5 | 2.4           | 24.0 | 64.7                            | 20.4 | 9.2  | 4.7  | 1.0                    |
| Co/CuAl                           | 22.7         | 100.3        | 38.5                  | 30.9                  | 1.2 | 2.0           | 27.4 | 66.4                            | 19.2 | 8.9  | 4.1  | 1.4                    |
| CuCo/Al-IM                        | 23.0         | 99.9         | 35.0                  | 35.1                  | 0.6 | 0.7           | 28.6 | 59.1                            | 21.2 | 11.6 | 5.2  | 2.9                    |

**Table S3** The XPS and XAES data of copper in reduced catalysts.

| Samples    | BE(Cu 2p <sub>3/2</sub> ) | KE(CuL <sub>3</sub> VV) | α'(Cu) |
|------------|---------------------------|-------------------------|--------|
|            | (eV)                      | (eV)                    | (eV)   |
| CuAl       | 932.9                     | 917.5                   | 1850.4 |
| CuCoAl     | 933.7                     | 917.3                   | 1851.0 |
| Cu/CoAl    | 932.8                     | 917.5                   | 1850.3 |
| CuCo/Al-IM | 932.9                     | 917.8                   | 1850.7 |

**Table S4** Quantitative analysis about the surface Co species concentration from XPS spectra.

| Samples    | Surface Co species concentration |                  |                 |
|------------|----------------------------------|------------------|-----------------|
|            | Co <sup>2+</sup>                 | Co <sup>3+</sup> | Co <sup>0</sup> |
| CuAl       | -                                | -                | -               |
| CuCoAl     | 0.50                             | 0.33             | 0.17            |
| Cu/CoAl    | 0.70                             | 0.26             | 0.04            |
| CuCo/Al-IM | 0.32                             | 0.61             | 0.07            |
| CoAl       | 0.29                             | 0.71             | 0               |
